# Supplementary material for: Cortical adaptation to sound reverberation
Source: eLife journal article supplement (doi:10.7554/elife.75090), 2022-05-26
Supplement: supp [file elife_poa_e75090_Figure_3_figure_supplement_2.pdf › elife_poa_e75090_Figure_3_figure_supplement_2.pdf]

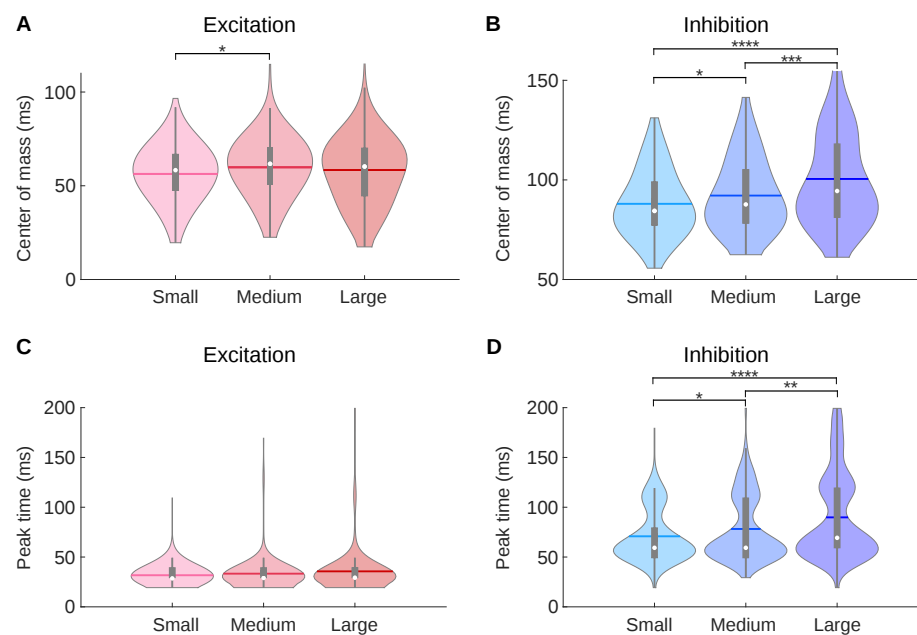

**Figure 3 – Figure Supplement 2.** A medium room condition shows intermediate center of mass and peak time values compared to the small and large room conditions.
