# Supplementary material for: Cortical adaptation to sound reverberation
Source: eLife journal article supplement (doi:10.7554/elife.75090), 2022-05-26
Supplement: supp [file elife_poa_e75090_Figure_4_figure_supplement_1.pdf › elife_poa_e75090_Figure_4_figure_supplement_1.pdf]

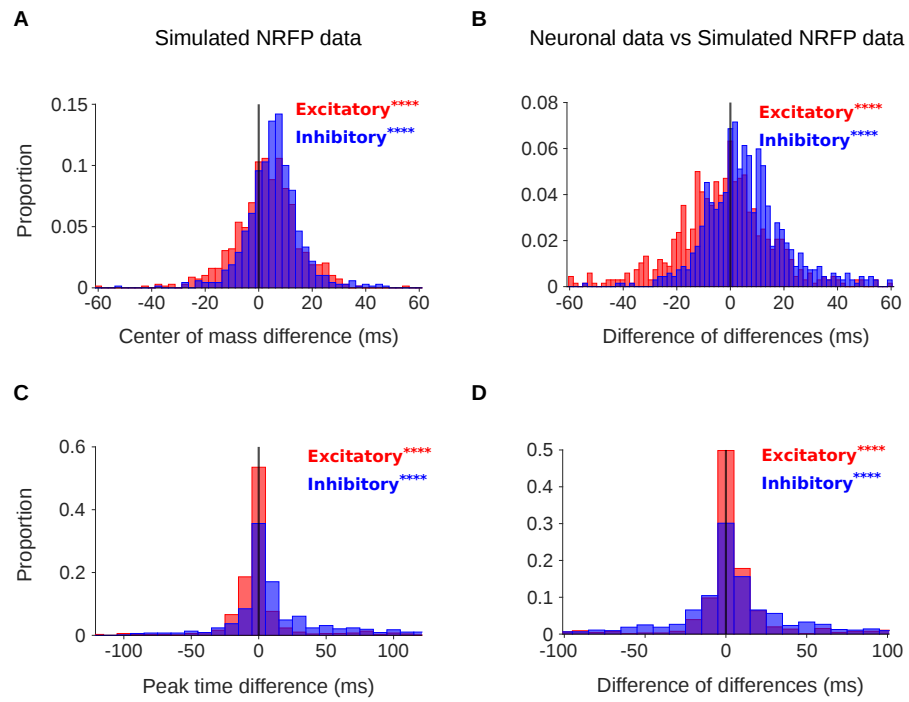

**Figure 4 – Figure Supplement 1. Comparison of real neurons and non-adapting network receptive field-Poisson (NRFP) simulated neurons.**
