# Supplementary material for: Cortical adaptation to sound reverberation
Source: eLife journal article supplement (doi:10.7554/elife.75090), 2022-05-26
Supplement: supp [file elife_poa_e75090_Figure_6_figure_supplement_1.pdf › elife_poa_e75090_Figure_6_figure_supplement_1.pdf]

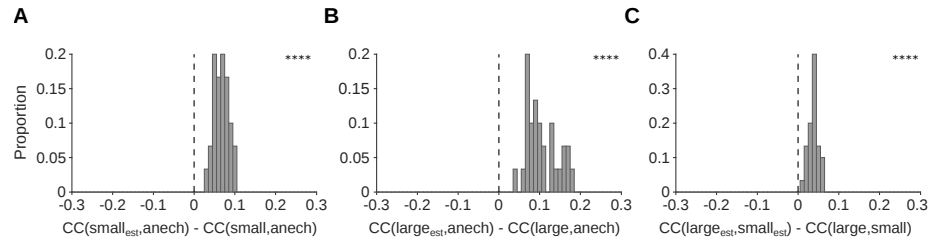

**Figure 6 – Figure Supplement 1.** The estimated cochleagrams produced by the dereverberation model are more reverberation invariant than the original cochleagrams.
