# Supplementary figures and images for: Cortical adaptation to sound reverberation
Source: eLife journal article supplement (doi:10.7554/elife.75090), 2022-05-26

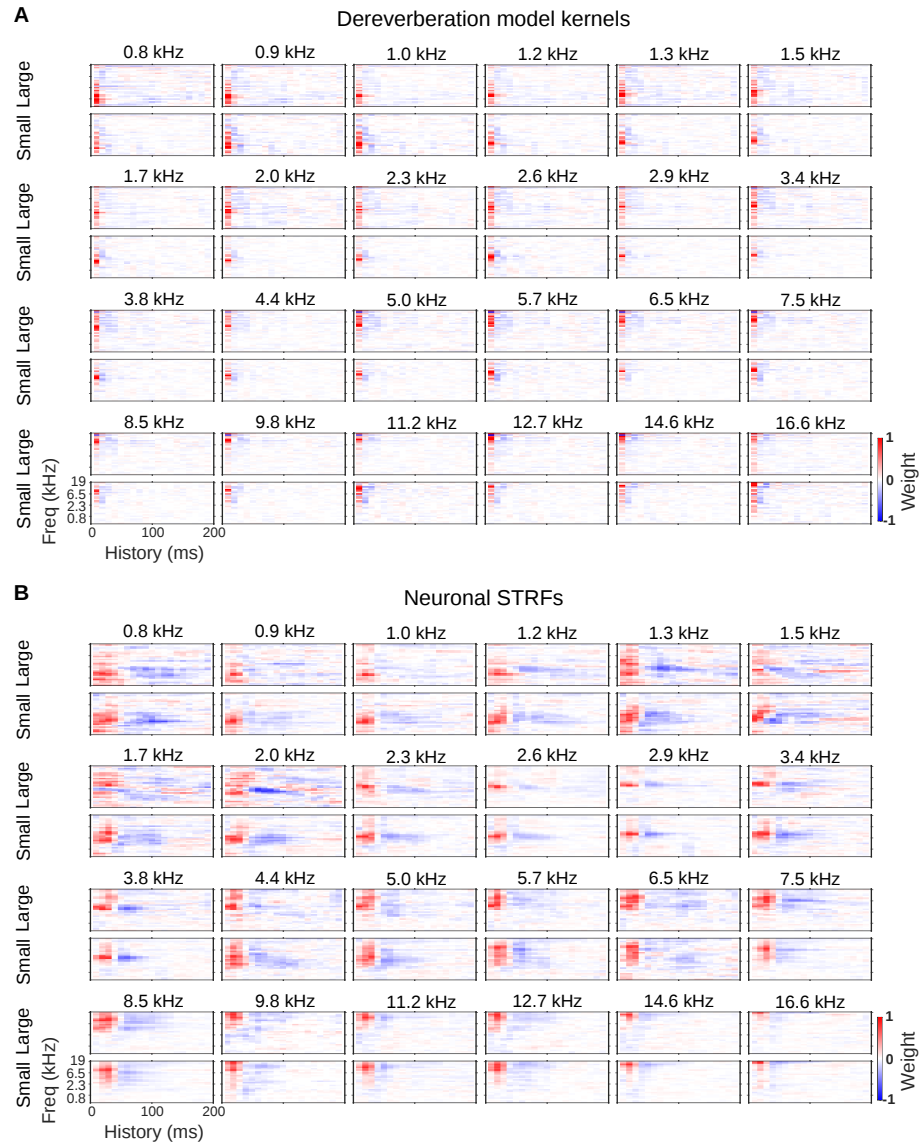

**Figure 2 – Figure Supplement 1. Model kernels and neuronal STRFs across frequency channels.**

Supplement: supp [file elife_poa_e75090_Figure_2_figure_supplement_1.pdf › elife_poa_e75090_Figure_2_figure_supplement_1.pdf]

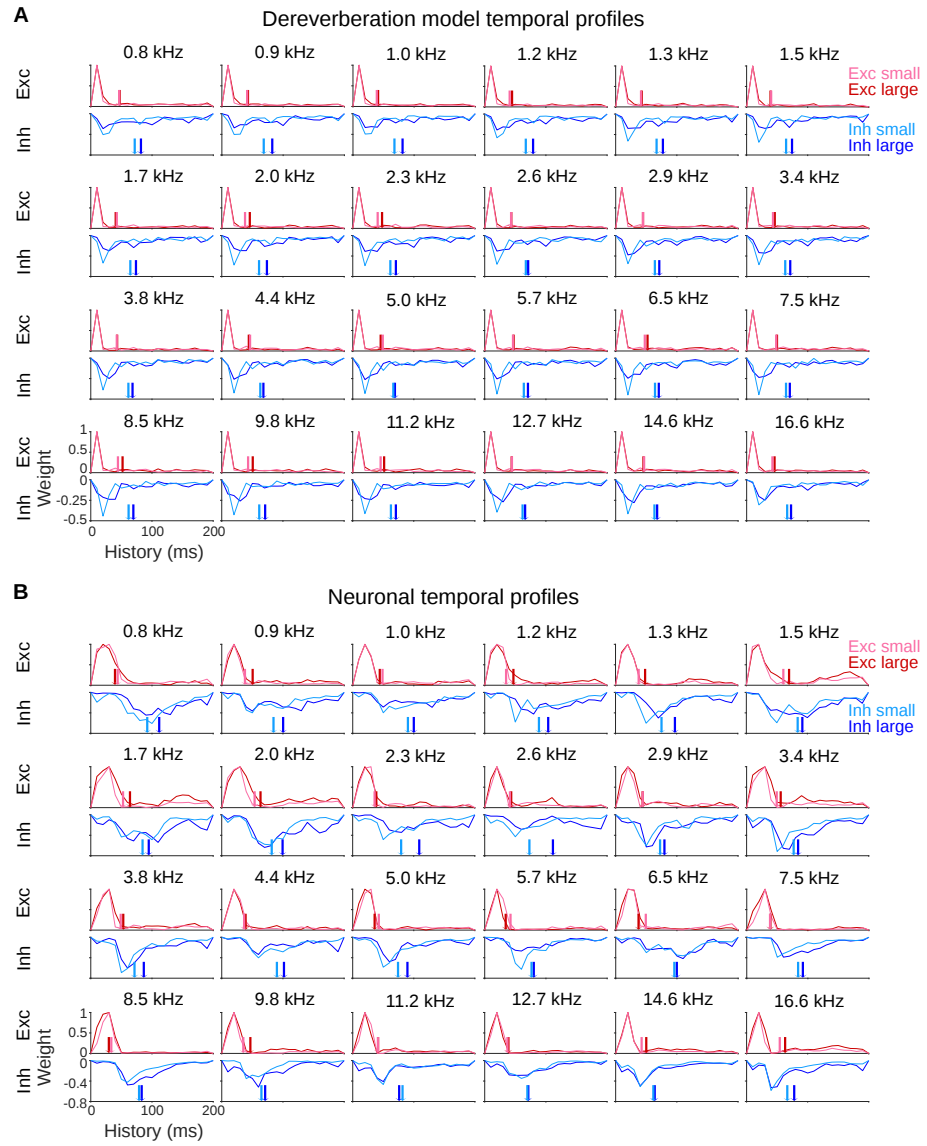

**Figure 2 – Figure Supplement 2. Model and neuronal temporal profiles across frequency channels.**

Supplement: supp [file elife_poa_e75090_Figure_2_figure_supplement_2.pdf › elife_poa_e75090_Figure_2_figure_supplement_2.pdf]

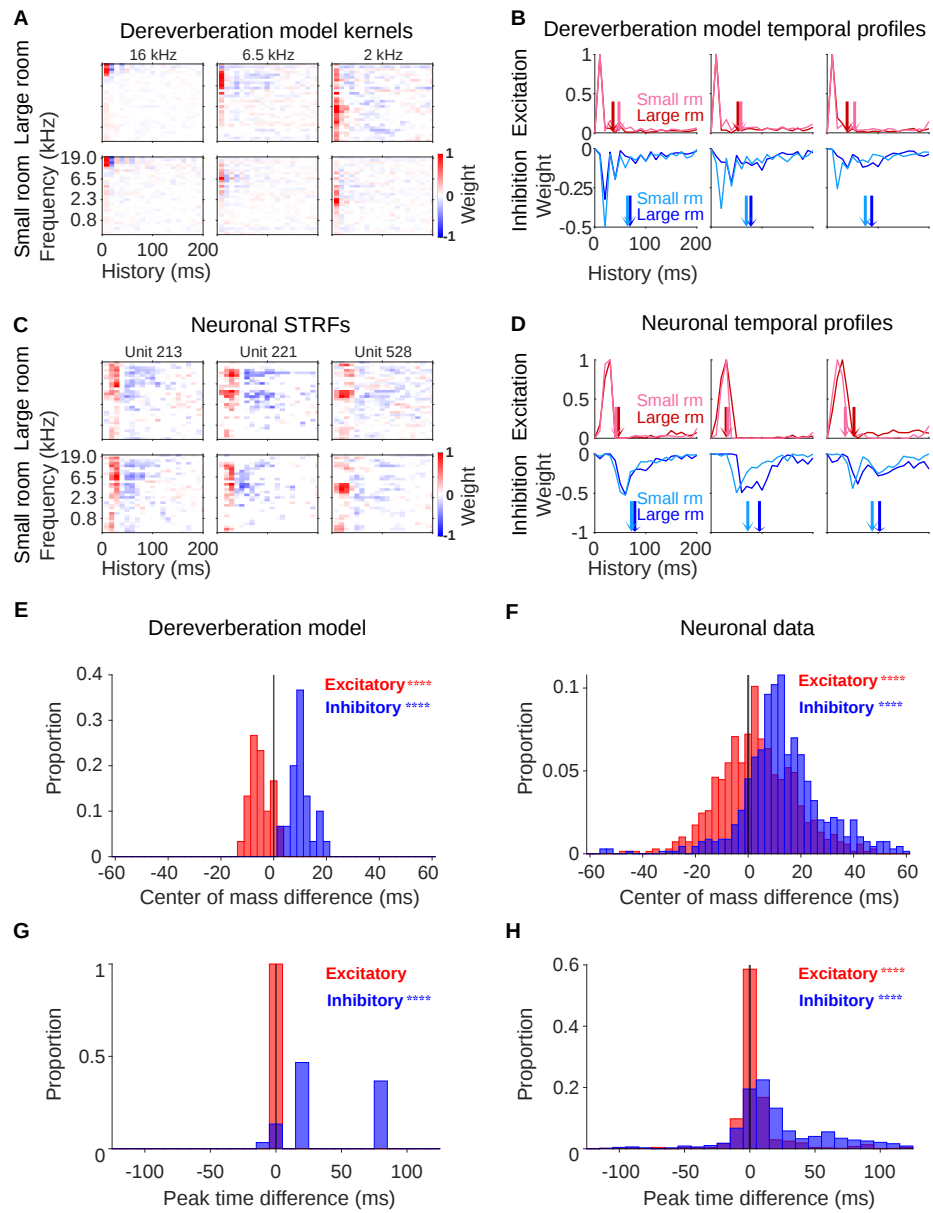

**Figure 3 – Figure Supplement 1. Analyses using the Carney Bruce Erfani Zilany (CBEZ) cochlear model**

Supplement: supp [file elife_poa_e75090_Figure_3_figure_supplement_1.pdf › elife_poa_e75090_Figure_3_figure_supplement_1.pdf]

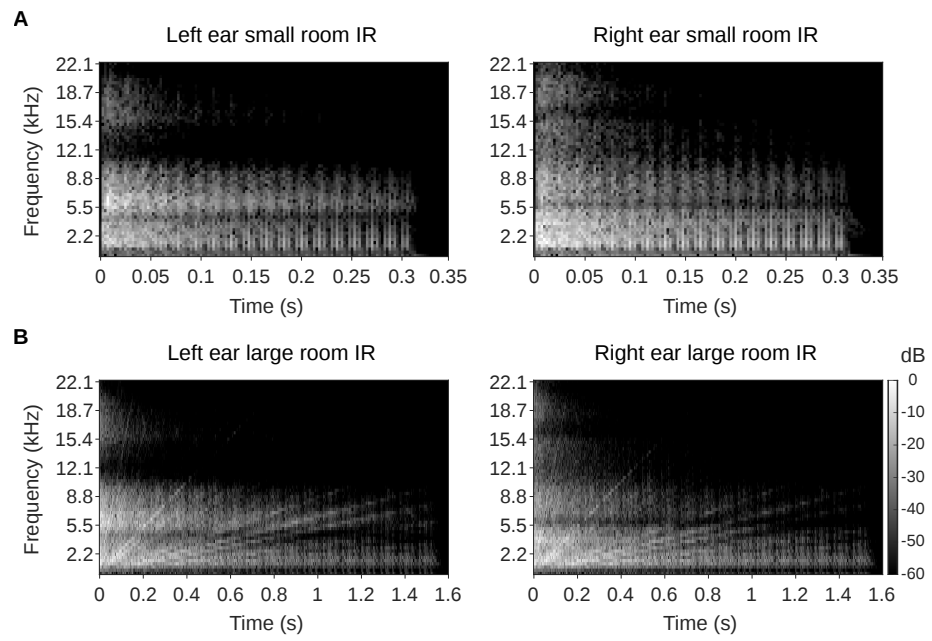

**Figure 7 – Figure Supplement 1. Binaural room impulse responses**

Supplement: supp [file elife_poa_e75090_Figure_7_figure_supplement_1.pdf › elife_poa_e75090_Figure_7_figure_supplement_1.pdf]
